# Supplementary material
Source: publisher site journal article supplement (https://www.dovepress.com/article/459757)
Supplement: Supplementary file 1 [file get_supplementary_file.php]

# Supplementary materials

## Q-Q plots for all the data

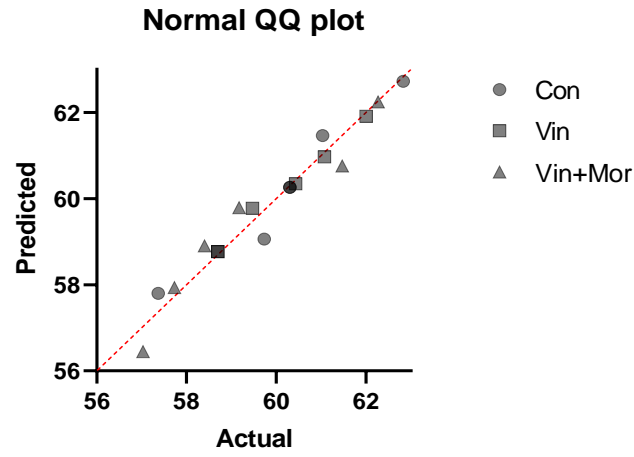

day 0

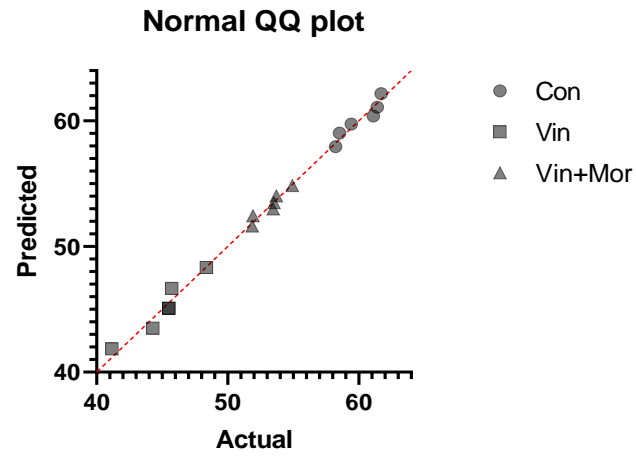

day 3

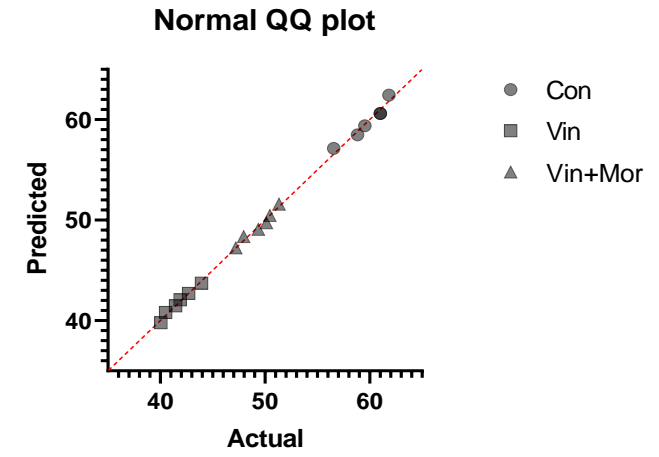

day 7

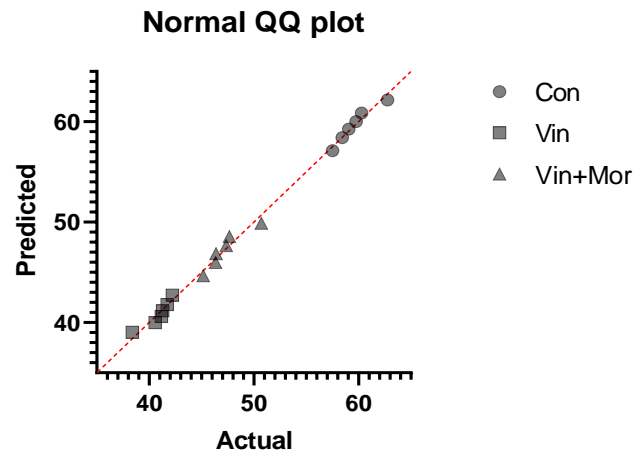

day 10

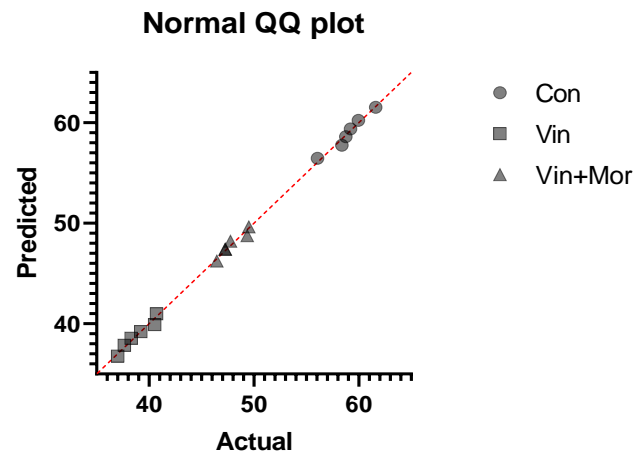

day 14

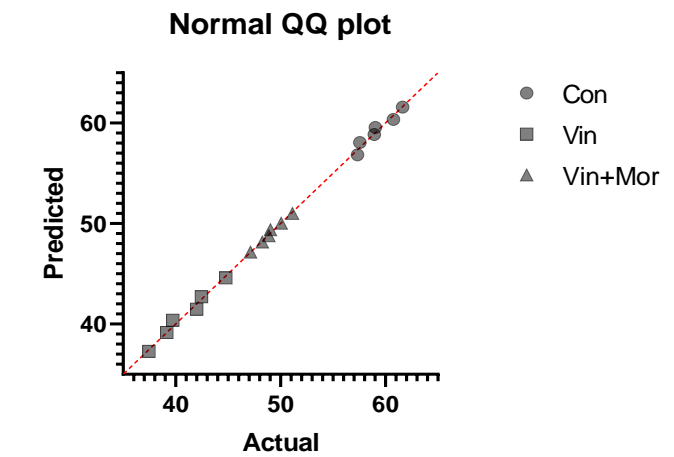

day 21

Q-Q plots for Fig. 1B

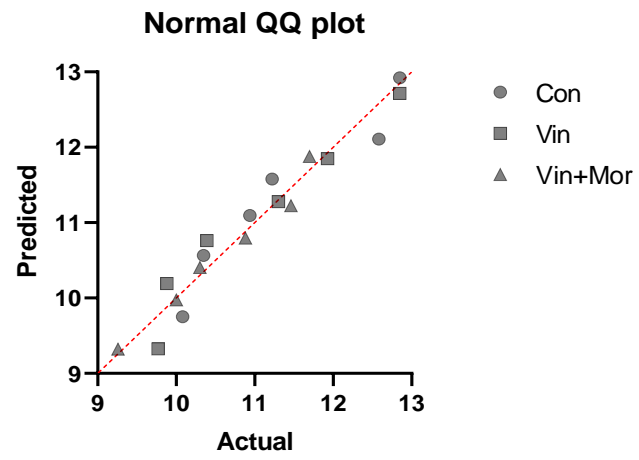

day 0

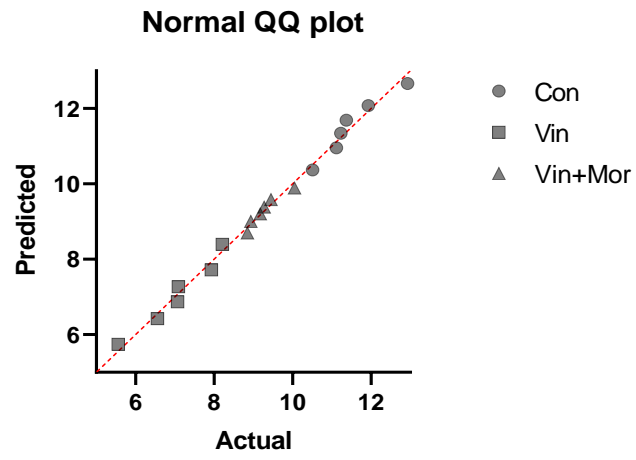

day 3

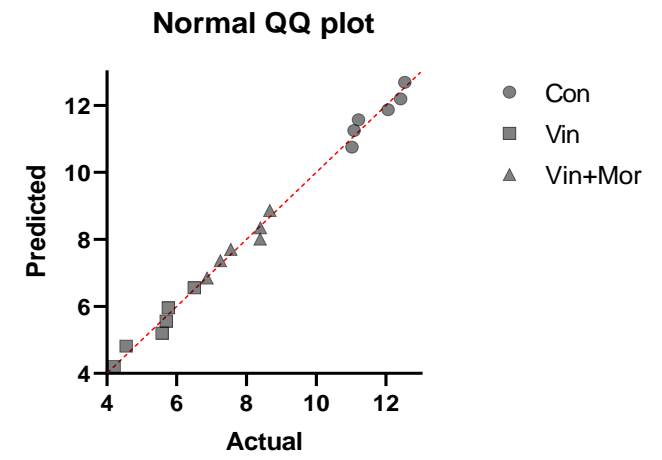

day 7

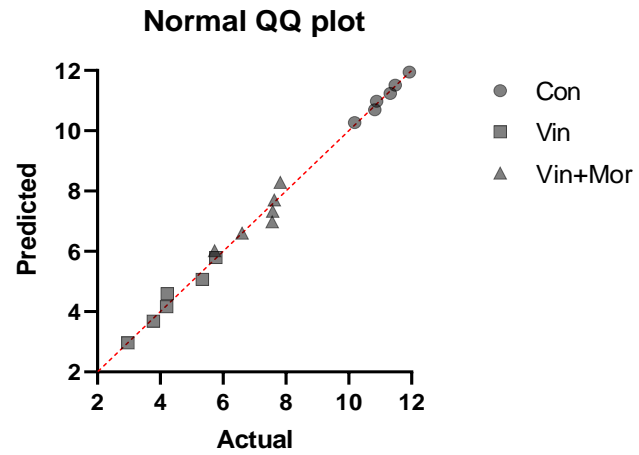

day 10

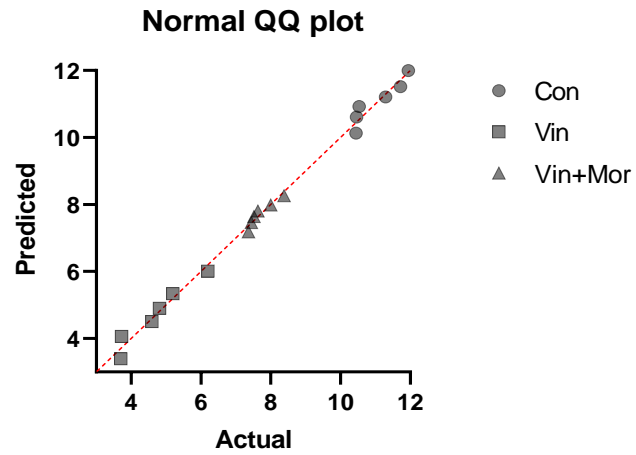

day 14

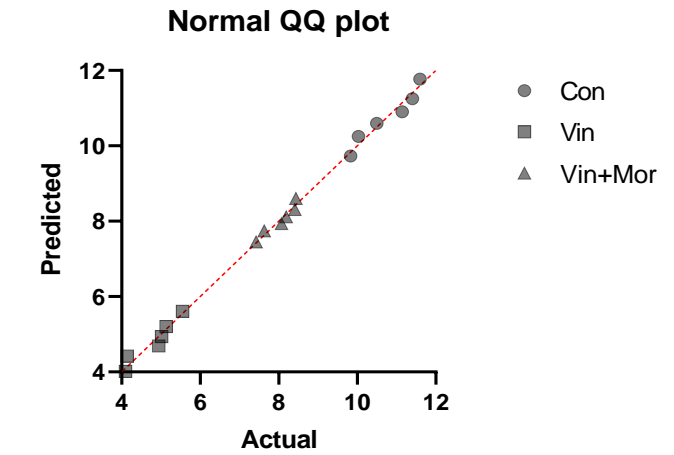

day 21

**Q-Q plots for Fig. 1C**

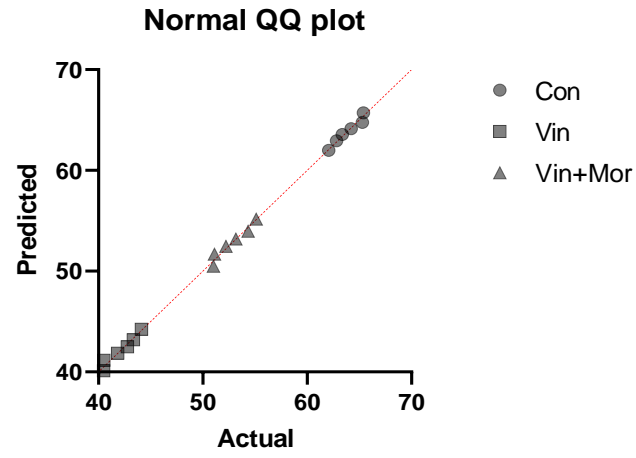

**Q-Q plots for Fig. 2A**

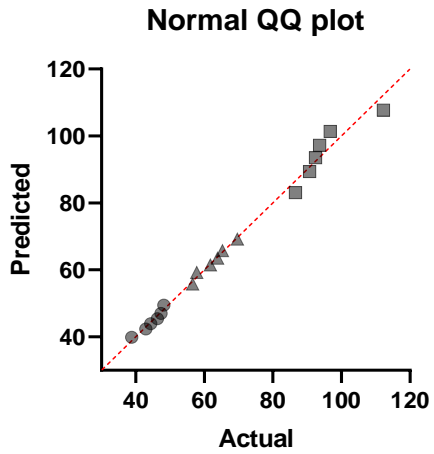

IL-1 $\beta$

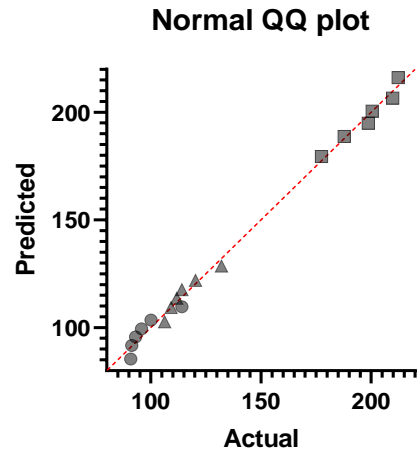

IL-6

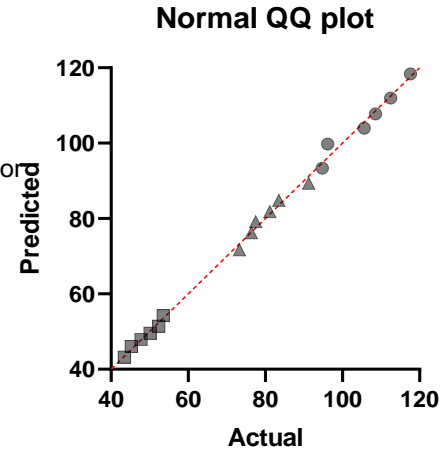

IL-4

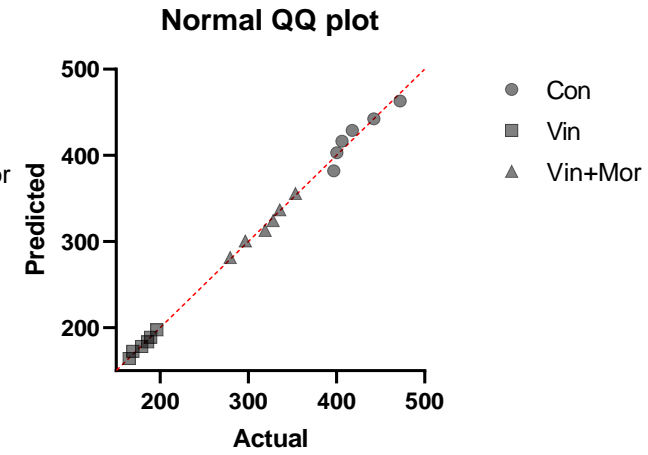

IL-10

**Q-Q plots for Fig. 2C**

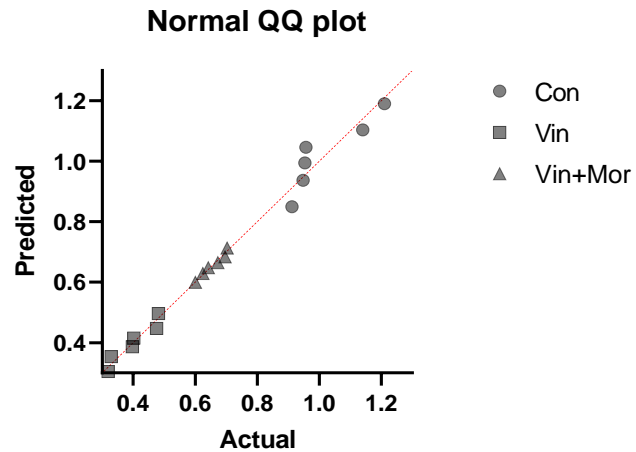

Fig. 3B

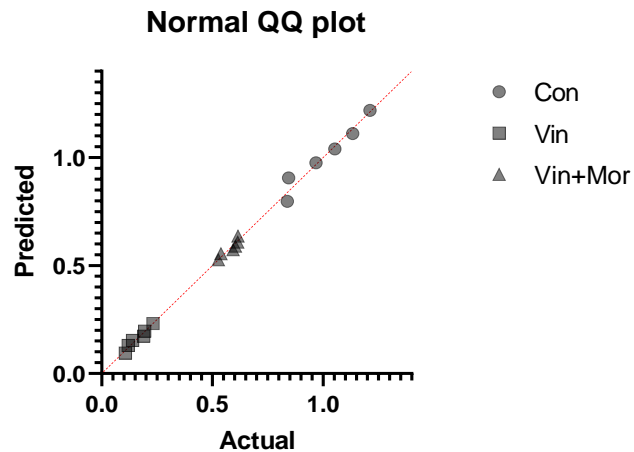

Fig. 3C

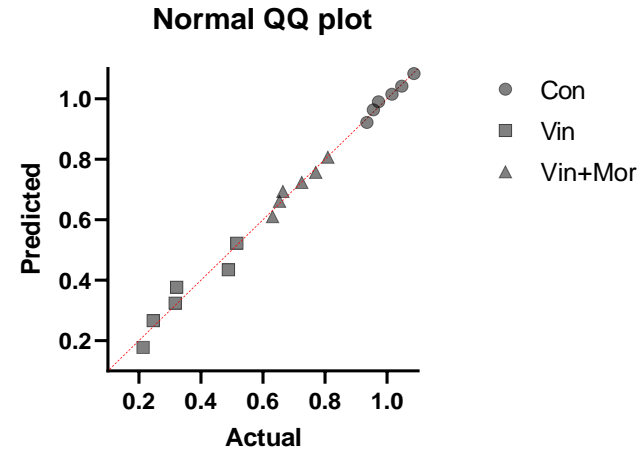

Fig. 3D

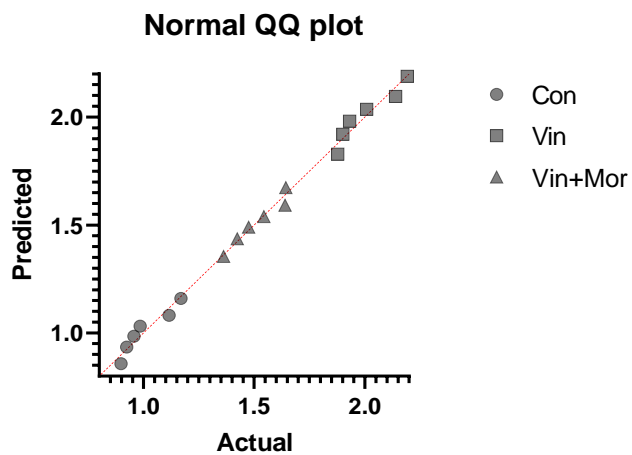

Fig. 3F

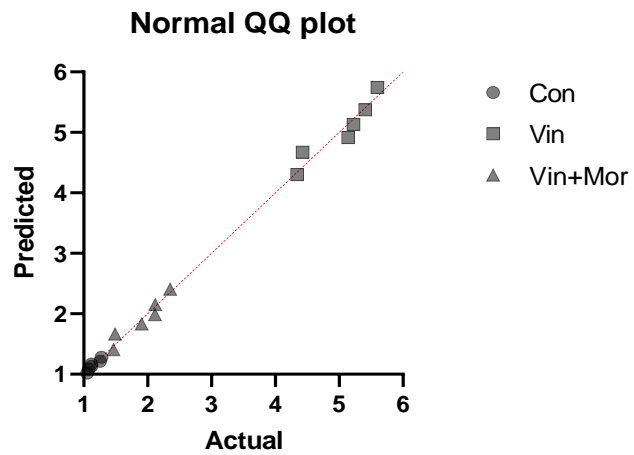

Fig. 3G

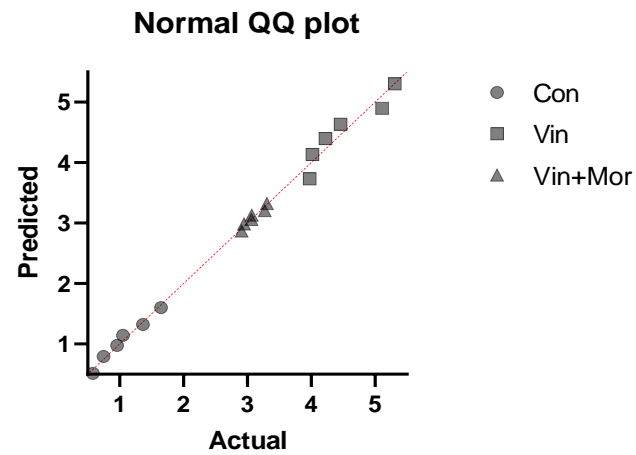

Fig. 3H

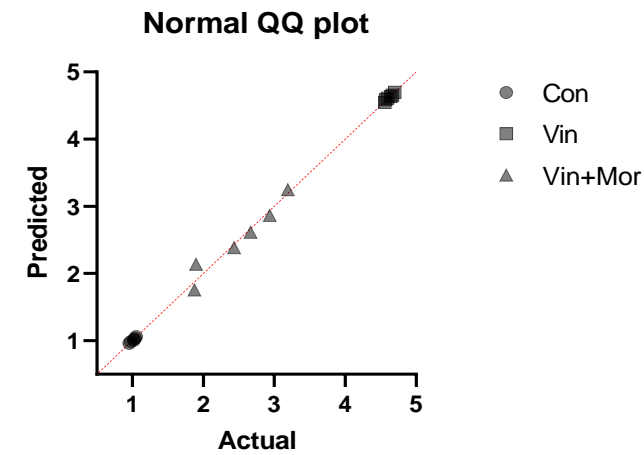

Fig. 3J

**Q-Q plots for Fig. 3**

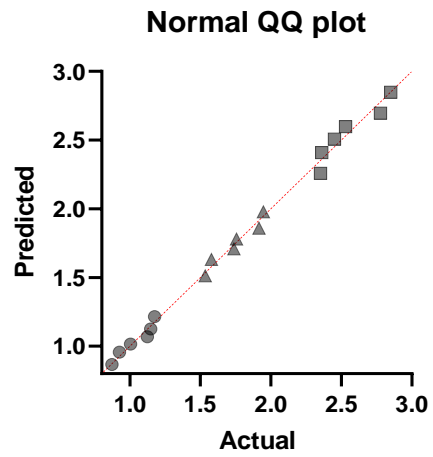

Fig. 4B

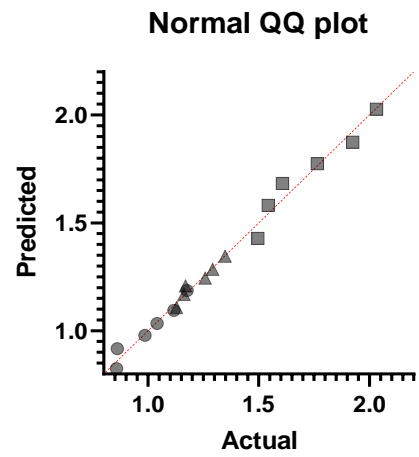

Fig. 4C

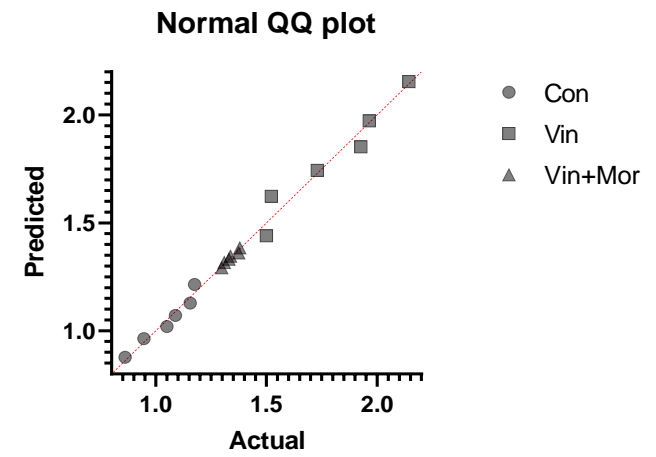

Fig. 4D

**Q-Q plots for Fig. 4**

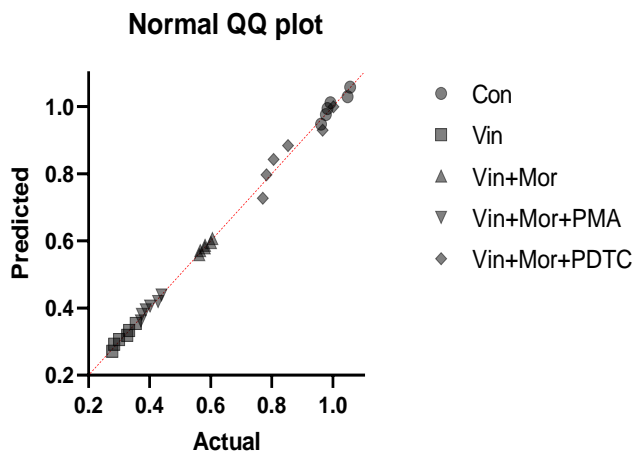

Fig. 5B

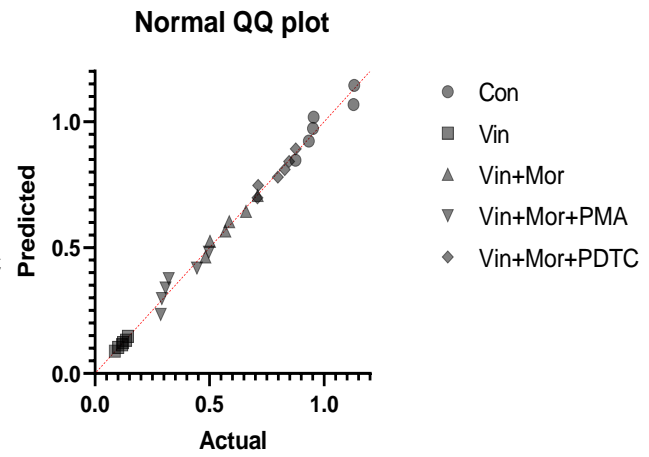

Fig. 5C

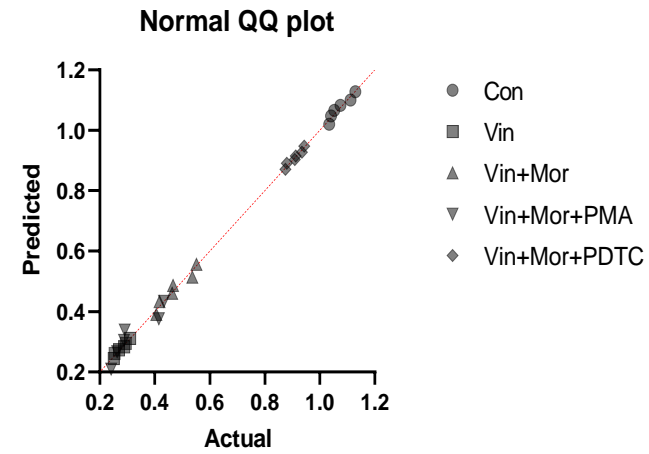

Fig. 5D

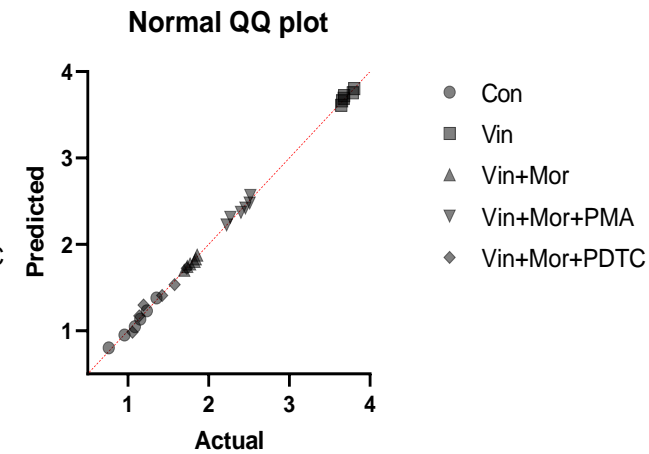

Fig. 5F

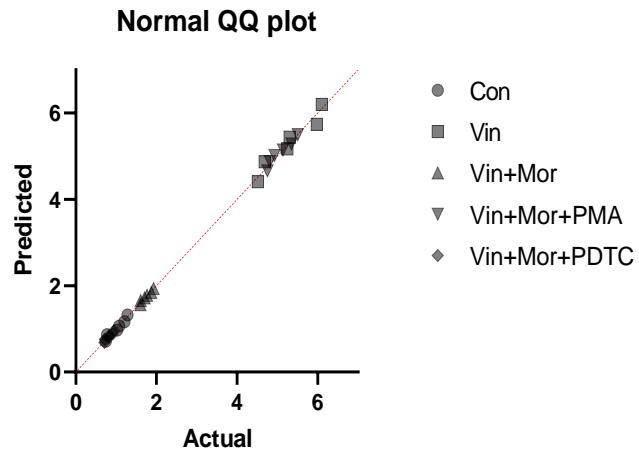

Fig. 5G

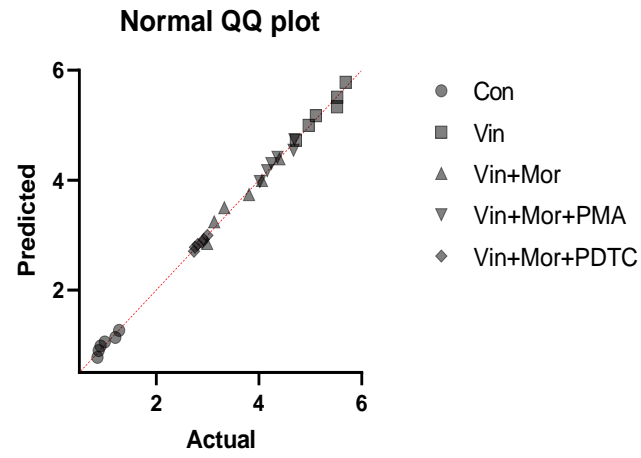

Fig. 5H

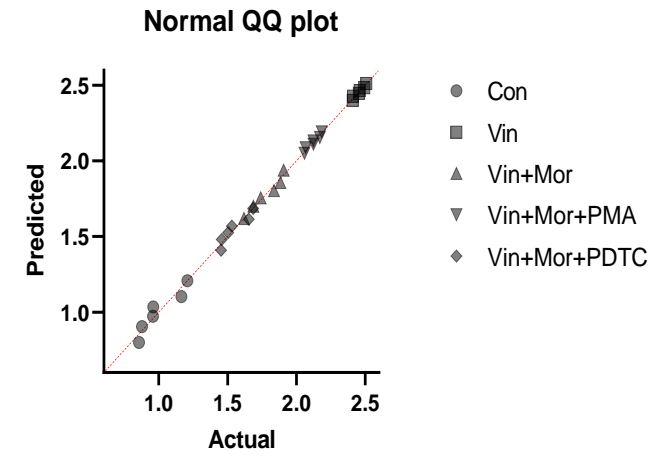

Fig. 5J

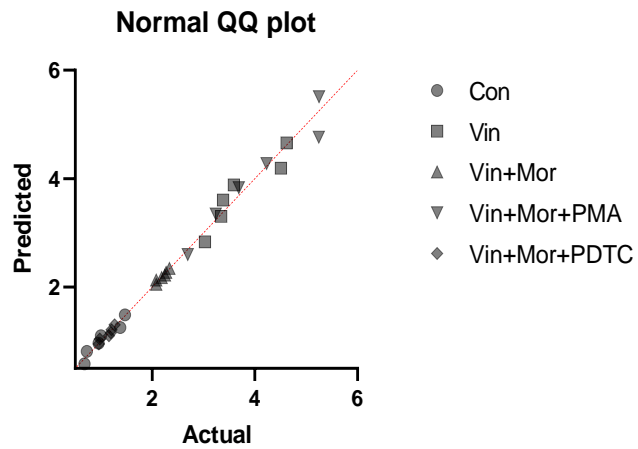

Fig. 5K

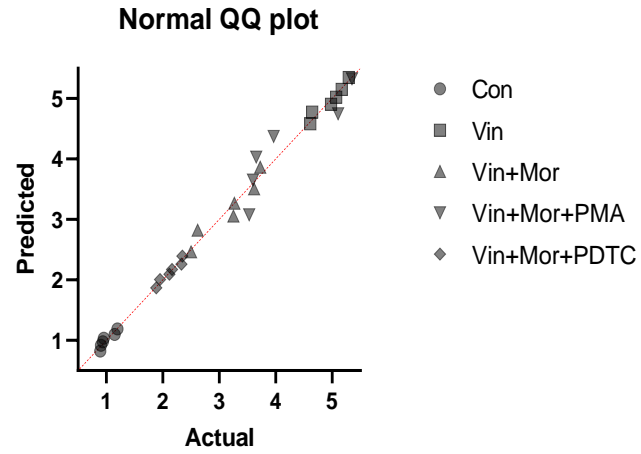

Fig. 5L

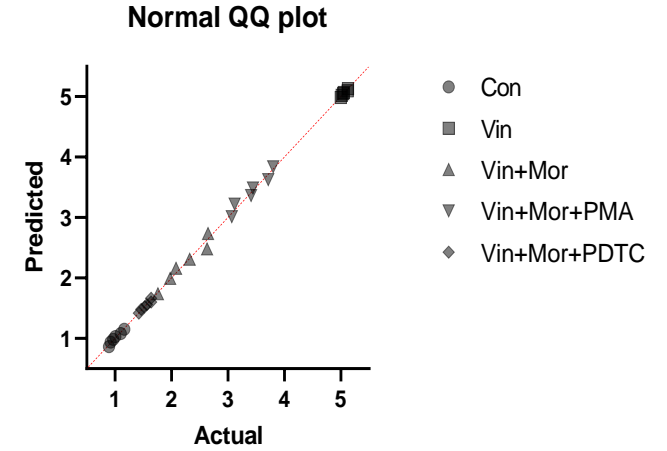

Fig. 5N

**Q-Q plots for Fig. 5**

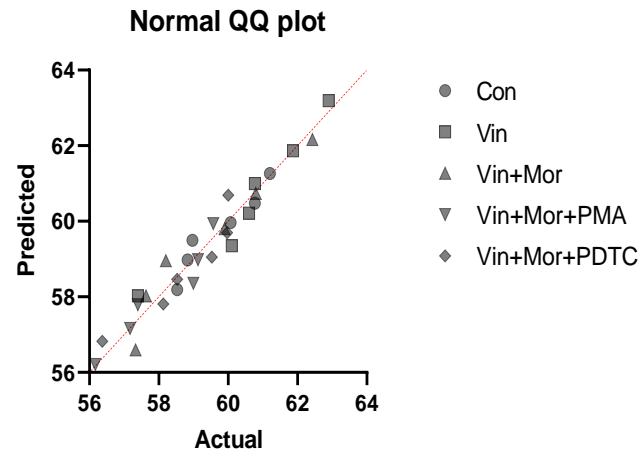

day 0

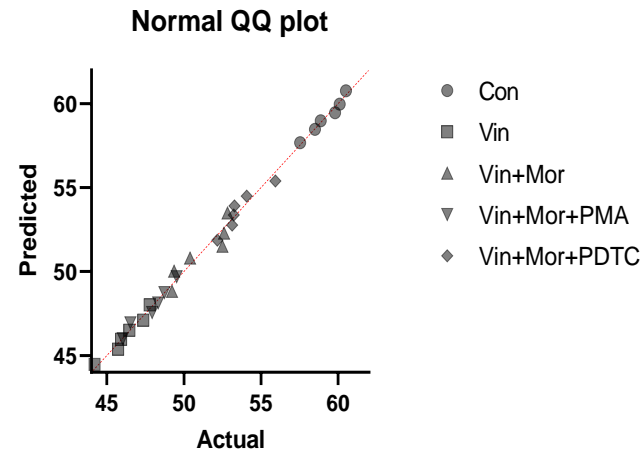

day 3

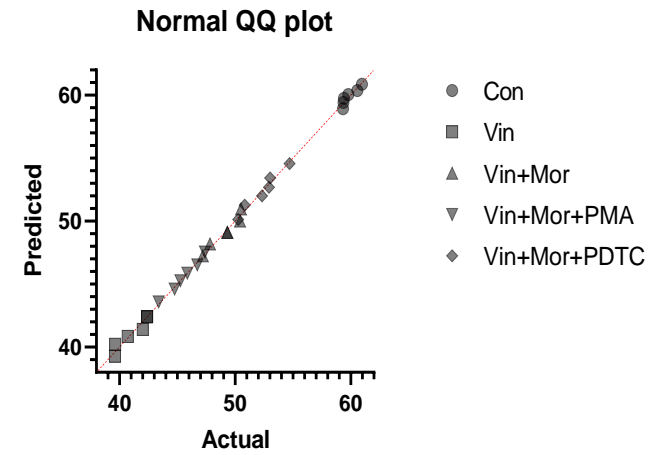

day 7

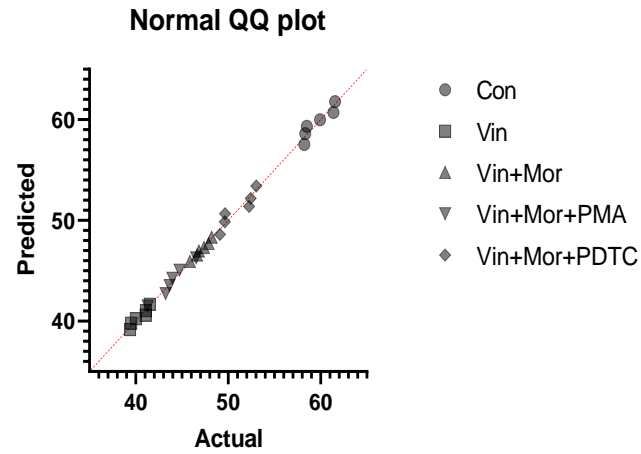

day 10

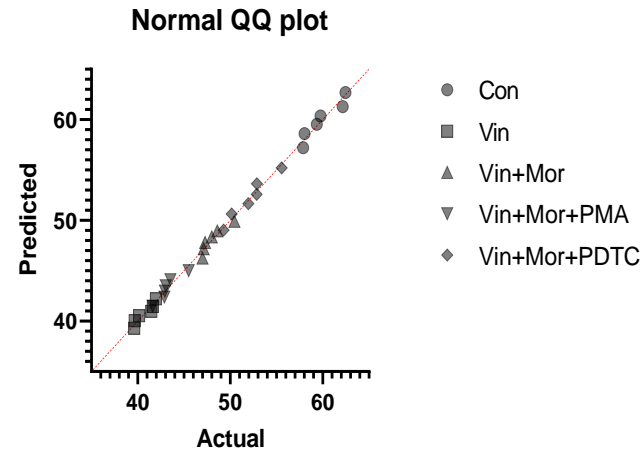

day 14

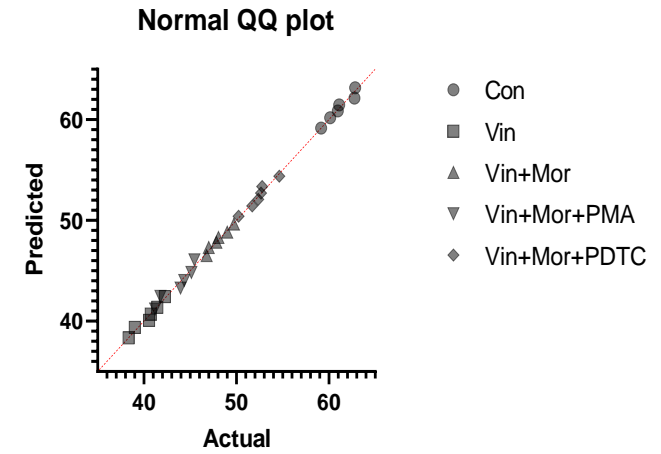

day 21

**Q-Q plots for Fig. 6A**

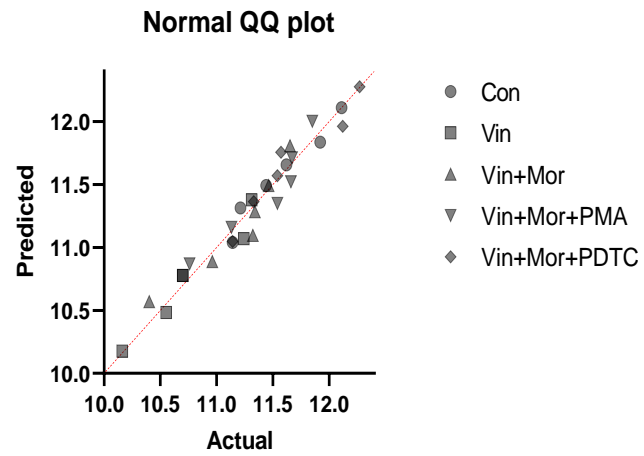

day 0

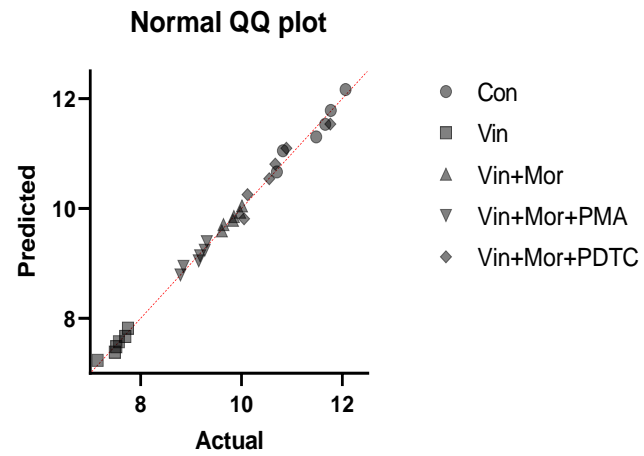

day 3

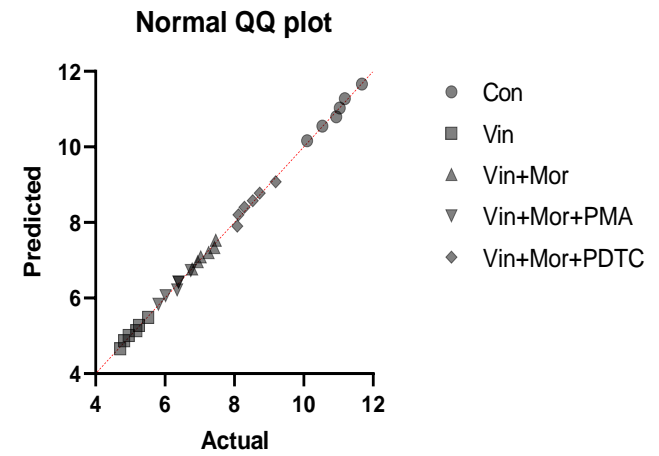

day 7

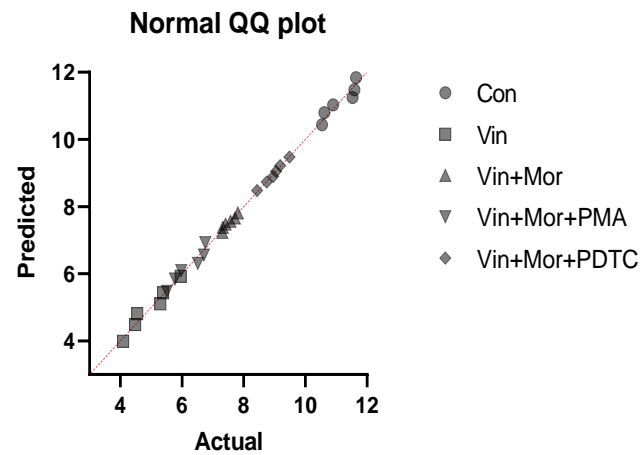

day 10

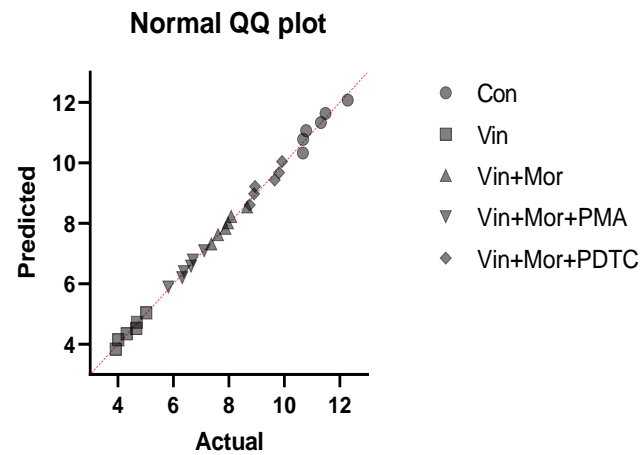

day 14

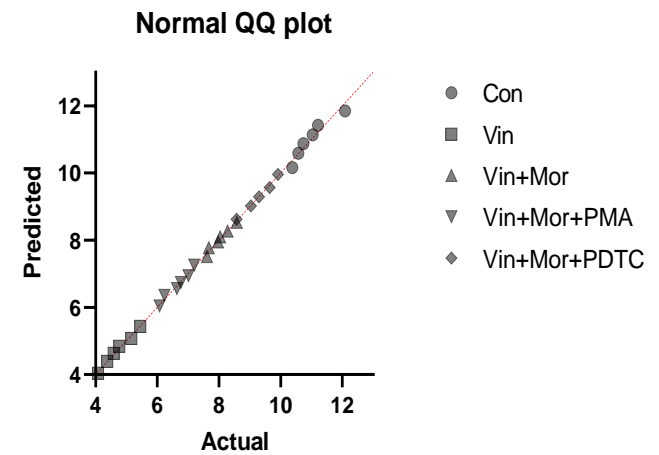

day 21

**Q-Q plots for Fig. 6B**



Normal QQ plot

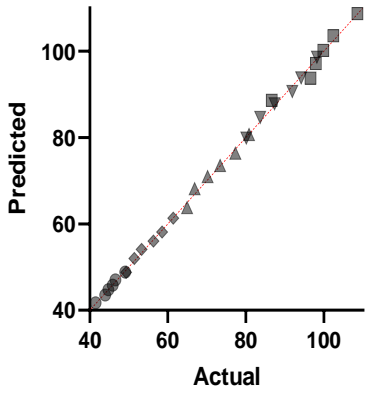

IL-1 $\beta$

- Con
- Vin
- ▲ Vin+Mor
- ▼ Vin+Mor+PMA
- ◆ Vin+Mor+PDTC

Normal QQ plot

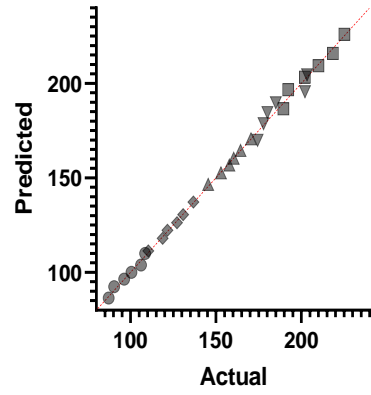

IL-6

- Con
- Vin
- ▲ Vin+Mor
- ▼ Vin+Mor+PMA
- ◆ Vin+Mor+PDTC

Normal QQ plot

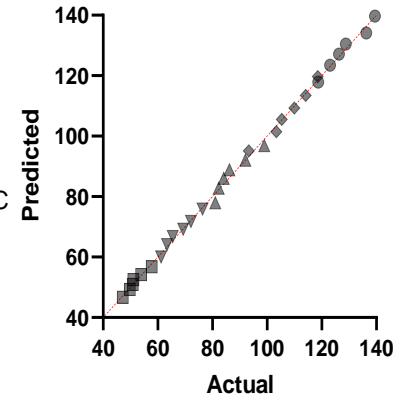

IL-4

- Con
- Vin
- ▲ Vin+Mor
- ▼ Vin+Mor+PMA
- ◆ Vin+Mor+PDTC

Normal QQ plot

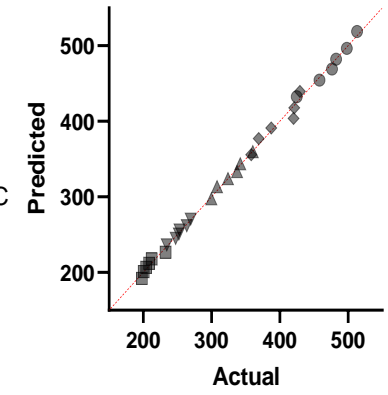

IL-10

- Con
- Vin
- ▲ Vin+Mor
- ▼ Vin+Mor+PMA
- ◆ Vin+Mor+PDTC

### Q-Q plots for Fig. 6C

Normal QQ plot

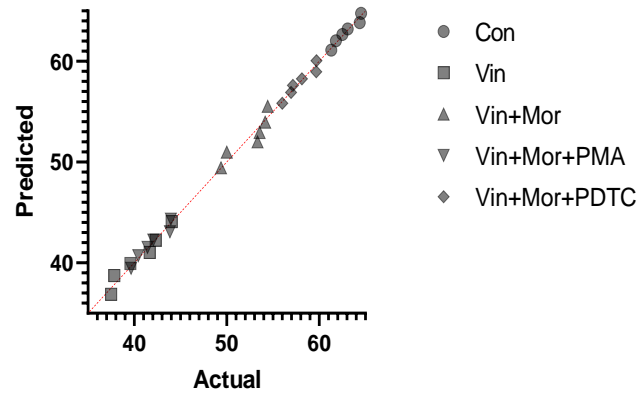

### Q-Q plots for Fig. 7B
